# Analysis of SARS-CoV-2 Omicron Neutralization Data up to 2021-12-22

Antonia Netzl<sup>1,\*</sup>, Sina Tureli<sup>1,\*</sup>, Eric LeGresley<sup>1,\*</sup>, Barbara Mühlemann<sup>2,3</sup>, Samuel H. Wilks<sup>1</sup>,  
Derek J. Smith<sup>1,\*\*</sup>

<sup>1</sup>Center for Pathogen Evolution, Dept of Zoology, University of Cambridge, UK

<sup>2</sup>Institute of Virology, Charité-Universitätsmedizin Berlin, corporate member of Freie Universität Berlin, Humboldt-Universität zu Berlin, and Berlin Institute of Health, 10117 Berlin, Germany

<sup>3</sup>German Centre for Infection Research (DZIF), partner site Charité, 10117 Berlin, Germany

\*These authors contributed equally, \*\*Correspondence: Derek Smith [djs200@cam.ac.uk](mailto:djs200@cam.ac.uk)

## Abstract

The rapid spread of the Omicron SARS-CoV-2 variant (B.1.1.529) resulted in international efforts to quickly assess its escape from immunity generated by vaccines and previous infections. Numerous laboratories published Omicron neutralization data as preprints and reports. The understandable limitations and variability in such rapid reporting of early results however made it difficult to make definitive statements about the data. Here, we aggregate and analyze Omicron neutralization data from 23 reporting laboratories up to 2021-12-22. There are enough data to identify multiple trends and make two definitive points. First, in twice-vaccinated individuals, titer fold drop of Omicron relative to wild type is more than 19x, likely substantially more given the number of measurements below the limit of detection of the assay. Second, out to one month post third vaccination with an mRNA vaccine, or twice vaccinated after an earlier infection, the titer fold drop to Omicron is substantially less at approximately 7x. This substantially lower fold drop and somewhat higher titers after 3rd vaccination are strong early evidence for the utility of booster vaccination.

## 26 **Introduction**

27 The Omicron variant (B.1.1.529) was first reported to WHO on November 24, 2021 and has  
 28 been spreading quickly. To prepare for a new COVID-19 wave caused by Omicron, it is  
 29 important to get an early read on its ability to escape immunity acquired through vaccination,  
 30 factoring in different vaccine types and vaccination strategies. Multiple groups have quickly  
 31 produced data with serum sets and variants to hand and released them, mostly as preprints or  
 32 preliminary reports, for public use. In this manuscript we analyze the available data to identify  
 33 trends in Omicron's escape across laboratories and assays which might be explained by  
 34 infection and vaccination history. We present our results as forest-plot based visual analysis to  
 35 facilitate their joint interpretation. The aggregated data as basis for our analysis is available as  
 36 a publicly accessible google sheet document<sup>1</sup>.

37

38

## 39 **Results**

40 We have analyzed Omicron virus neutralization data from 23 laboratories which are either in  
 41 preprint form or are otherwise in the public domain. These data include neutralization of  
 42 Omicron by different vaccine sera and sera of individuals infected with the wild type, Alpha,  
 43 Beta or Delta variant. A variety of neutralization assays and cell types were used by the  
 44 different laboratories (Table 1).

45

### 46 **Omicron titer fold drop relative to wild type titers**

47 Fold drops in neutralization of Omicron compared to wild type in different vaccine sera are  
 48 shown in Figure 1, grouped by serum type and ordered by decreasing fold drop. We categorize  
 49 the data across studies into serum groups by their infection or vaccination history. In the "2x  
 50 Vax" group (n=44) we include double vaccinated individuals, independent of vaccine type, and

51 single dose Johnson & Johnson (J&J) vaccinated individuals as a single J&J dose is the  
 52 recommended vaccination regime. The convalescent sera (“Conv”) group (n=21) contains sera  
 53 from individuals that were infected with a SARS-CoV-2 variant, the “Inf + 2 x Vax” (n=9) sera  
 54 from individuals that were vaccinated after being infected. Similarly, the “2x Vax + Inf” group  
 55 (n=4) contains sera from individuals that were infected subsequently to their vaccinations.  
 56 Finally, the “3x Vax” group (n=19) consists of triple vaccinated sera.

57

58 The largest serum group consists of double vaccinated or J&J single dose vaccinated  
 59 individuals. This twice-vaccinated regroup has the widest spread and largest uncertainty in fold  
 60 drop of Omicron neutralization compared to wild type. We find an approximately 19x fold drop  
 61 in the double vaccinated group. However, the majority of fold drops in double vaccinees are  
 62 likely greater than the point estimate given here due to many Omicron titers being below the  
 63 limit of detection for the assay. Further, fold drops less than 2 are often the result of low titers  
 64 against the reference antigen, as in Balazs<sup>19</sup> J&J recently vaccinated. The average fold drop in  
 65 the double vaccinated group is thus likely substantially greater than the mean of 19x seen  
 66 here.

67

68 There is a strikingly different pattern in the group of triple vaccinated individuals. Here, almost  
 69 all Omicron titers were detectable and fold drops lower and more narrowly distributed than in  
 70 double vaccinees. The average fold drop from wild type (WT) is 7x. The majority of sera from  
 71 three times vaccinated individuals were, however, taken within one month of the last  
 72 vaccination and thus do not provide information of how these titers will develop over time.

73 The infected + double vaccinated cohort is closest to the triple vaccinated in spread and mean  
 74 fold drop, with the majority of Omicron titers being above the detection threshold and an  
 75 average fold drop from wild type of 12x. Data from studies that examined the neutralization

76 reduction in vaccinated and later infected individuals suggest a similar pattern. Noteworthy, the  
 77 study by Cong et al.,<sup>14</sup> (Liu) that describes the largest fold drop to WT is in this group, resulting  
 78 in the largest mean fold drop of 25x, but samples tested in this study were obtained from  
 79 individuals with an acute Delta infection three days after hospitalization.

80

81 Generally, infection without vaccination appears to result in the second highest average fold  
 82 drop from wild type (20x). In this serum group, the second largest overall fold drop was  
 83 reported by Cong et al.<sup>14</sup>(Liu), again in sera from individuals three days after hospitalization but  
 84 with a wild type infection.

85 Fold drops grouped by vaccine manufacturer show that point estimate uncertainty is lowest in  
 86 mRNA vaccinees and infected + mRNA vaccinated individuals (Extended Data Figure 1).  
 87 Alternative grouping strategies by neutralization assay reveal no substantial difference in mean  
 88 fold drops between pseudovirus (PV) and live-virus (LV) neutralization assays in the double  
 89 and triple vaccinated serum groups (2x Vax LV: 19.6x, PV: 18.6x; 3x Vax LV: 8.8x, PV: 6.5x)  
 90 (Extended Data Figure 2). No trend is discernible based on cell type but HEK293T-ACE2 cells  
 91 most frequently resulted in measurements below detection threshold (Extended Data Figure  
 92 3). Fold drops against variants other than WT can be found in Extended Data Figure 4.

93

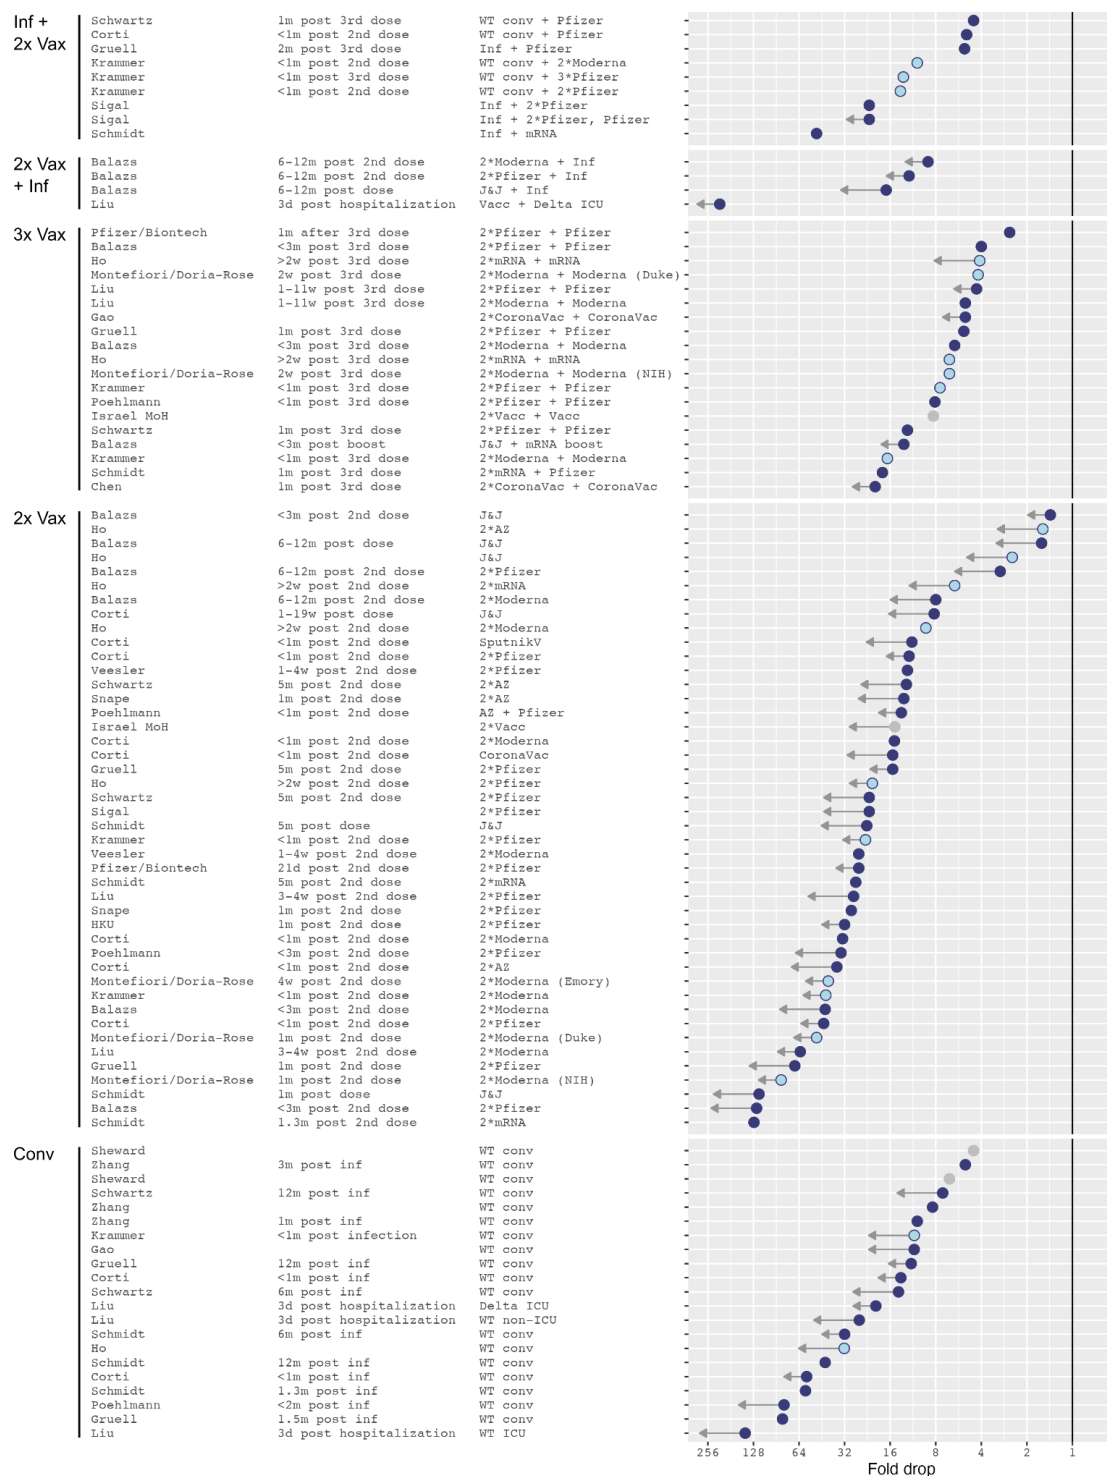

**Figure 1: Omicron fold drops relative to wild type.** Arrows indicate uncertainties in the point estimate due to titers below the limit of detection (LOD) of the assay. A short arrow marks measurements with less than half of Omicron titers below the assay's limit of detection (LOD), or conversely reference antigen titers at or higher than the LOD. Long arrows mark measurements with more than approximately 80% of Omicron titers below the LOD. Light blue dots show NIH SAVE laboratories, gray dots mark data points for which the reference antigen was not stated in the manuscript and is here assumed to be Wu-1. The solid vertical line marks no fold change.

# **Omicron titers relative to wild type titers**

In addition to fold drops relative to wild type titers, we report Omicron titers obtained by applying the fold drop shown in Figure 1 to the wild type GMTs. The point estimates grouped by serum type and ordered by decreasing wild type titer are presented in Figure 2.

It might be that the substantially lower fold drop in the three times vaccinees compared to two times vaccinees is because higher titers in three times vaccinees are being underreported, either by laboratories not titrating to the endpoint, or because of a high-titer non-linearity in the assay – something discussed in multiple forums. It can be clearly seen however from the data as presented in Figure 2 that in the triple vaccinated cohort, the fold drop from wild type to Omicron is independent of titer magnitude against wild type as evident by horizontal bars of similar length between WT and Omicron point estimates. Thus the substantially lower fold-drop in three times vaccinees is likely real.

On average, the highest titers against both WT and Omicron are recorded in the infected + vaccinated serum group (estimated WT GMT: 5674, Omicron GMT: 464). In the triple vaccinated group, mean titer estimates against WT and Omicron are at 40% and 70% of the mean values in the Inf + 2x Vax cohort, respectively (WT GMT: 2238, Omicron GMT: 332). In both serum groups, the majority of Omicron titers are above the assay detection threshold and hence Omicron titer estimates are largely reliable.

In contrast, due to many Omicron titers below the detection threshold in the remaining groups, the point estimates and thus also the mean Omicron titers are likely overestimated. Although WT titers in the group of vaccinated + infected sera were well detectable (WT GMT: 1583), due to below threshold titers the average Omicron titer of 57 is likely higher than the real value.

128 Similar patterns of high WT titers but barely detectable titers against Omicron occur in the  
129 convalescent (WT GMT: 647, Omicron GMT: 28) and 2x Vax cohorts (WT GMT: 491, Omicron  
130 GMT: 26).

131

132 In the 2x Vax cohort, WT titers after a single J&J dose or double SputnikV, CoronaVac tend to  
133 be lower than after two vaccinations with AstraZeneca. The mRNA vaccine sera generally  
134 exhibit the highest WT titers in this group. Further, we see that Liu<sup>14</sup>'s ICU samples (2x Vax +  
135 Infected & Conv serum group), which were taken three days after hospitalization, have the  
136 highest WT titers in their respective group and many thresholded Omicron titers, explaining the  
137 large fold drops observed in Figure 1.

138

139

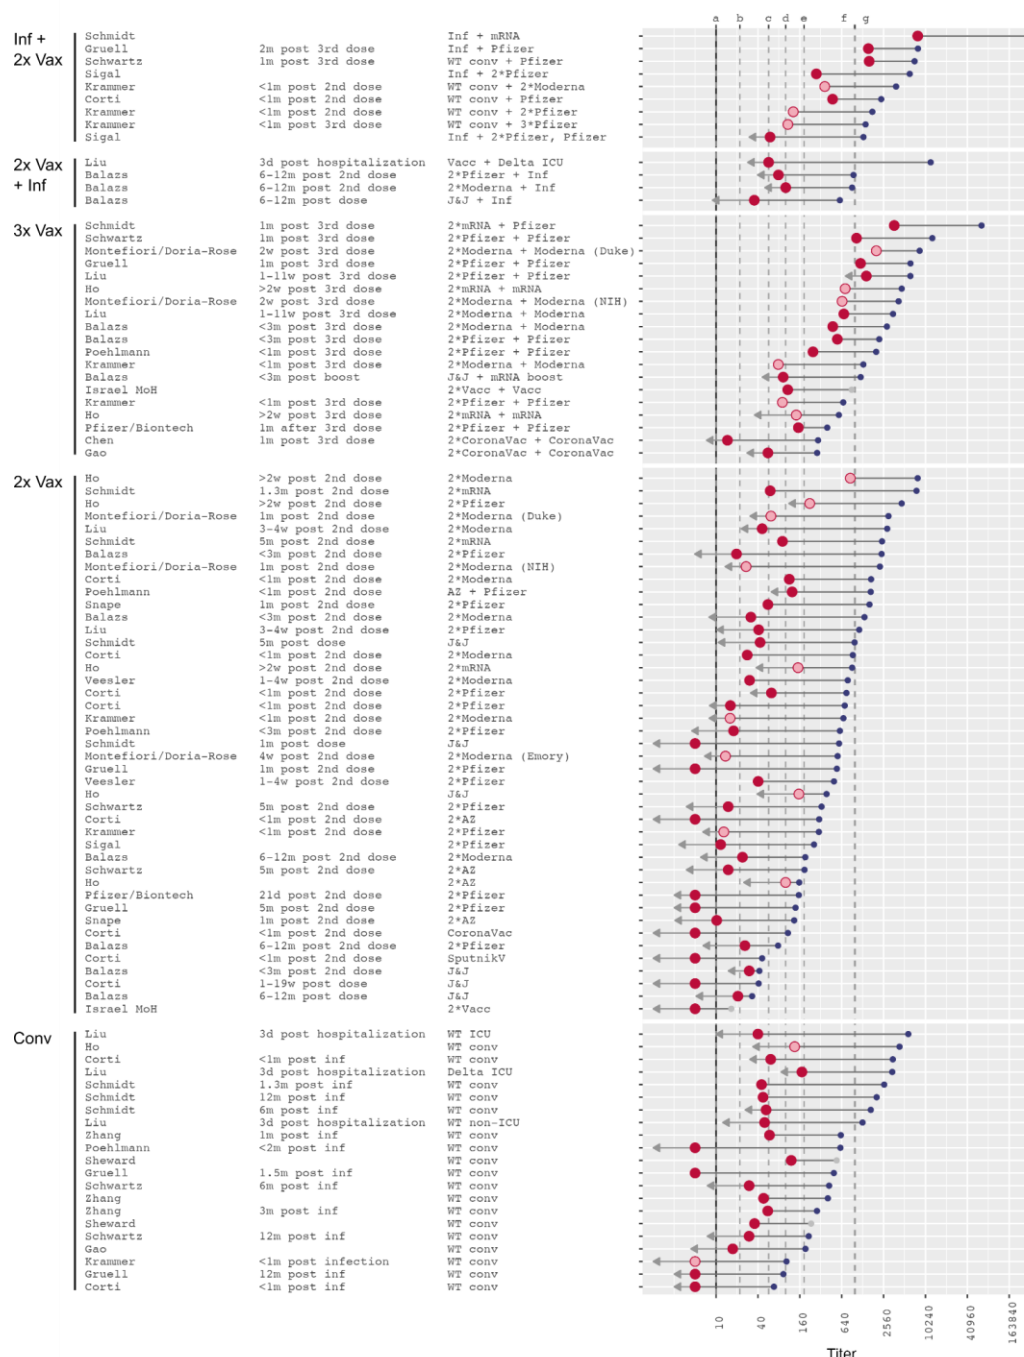

**Figure 2: Omicron titers relative to wild type ordered by decreasing wild type titers.** Large red dots indicate Omicron titers and small blue dots indicate wild type titers. Omicron titers were obtained by applying the fold drop given in Figure 1 to wild type titers, corresponding to the horizontal bar connecting wild type and Omicron point estimates. Arrows indicate uncertainties in the point estimate. A short arrow marks measurements with less than half of Omicron titers below the assay's limit of detection (LOD), or conversely reference antigen titers at or higher than the LOD. Long arrows mark measurements with more than approximately 80% of Omicron titers below the LOD. Dashed lines mark thresholds of protection against symptomatic disease after vaccination with two doses of Moderna (a,d,f,g)<sup>28</sup> or AstraZeneca (b,c,e,f)<sup>27</sup> assessed by pseudovirus neutralization assay (a 78% VE, b 60% VE, c 70% VE, d 91% VE, e 80% VE, f 90% VE, g 96% VE). Pink dots show NIH SAVE laboratories.

To estimate the protection against symptomatic disease, we compare the titers here against correlates of protection against symptomatic disease as determined by pseudovirus neutralization studies after two doses of AstraZeneca<sup>27</sup> or Moderna<sup>28</sup>. It must be noted however that it is not yet clear that VE estimates from these studies will apply to Omicron. Figure 3 shows titer estimates ordered by decreasing Omicron titers.

The mean Omicron titer estimate in the Inf + 2x Vax group suggests protection against symptomatic disease is >80% for Omicron as reported after two doses of AstraZeneca<sup>27</sup> (80% VE at ID50=185) or Moderna<sup>28</sup> (91% VE at ID50=100). In this group, the lowest Omicron titer would still confer 70% protection. In the triple vaccinated group, titer estimates within 1 month of the third dose for both WT and Omicron are high enough to suggest >80% protection against symptomatic disease. All Omicron titers, except for the Chen<sup>10</sup> 3xCoronaVac (BBIBP-CorV) estimate, are above the 70% VE threshold when we disregard uncertainties in the point estimates. As a result of large uncertainties and the question whether VE estimates apply to Omicron, we refrain from inferring correlates of protection in the remaining groups.

When comparing pseudovirus (PV) and live-virus (LV) neutralization assays, we see that laboratories that used pseudovirus assays to determine Omicron neutralization reported almost two times higher WT and Omicron GMTs in the 2x Vax group (Omicron LV GMT: 14, PV GMT: 31; WT LV GMT: 299, PV GMT: 570) and almost 3 times higher Omicron titers in triple vaccinees (Omicron LV GMT: 167, PV GMT: 453; WT LV GMT: 1428, PV GMT: 2630) than groups that performed live-virus assays (Extended Data Figures 5 & 6).

Omicron titers estimated against other variants than WT can be found in Extended Data Figure 7. In the Extended Data, we further show the titer estimates grouped by alternative strategies,

177 including vaccine type, assay type and cell type ordered by Omicron and WT titer (Extended  
178 Data Figures 5-9).  
179

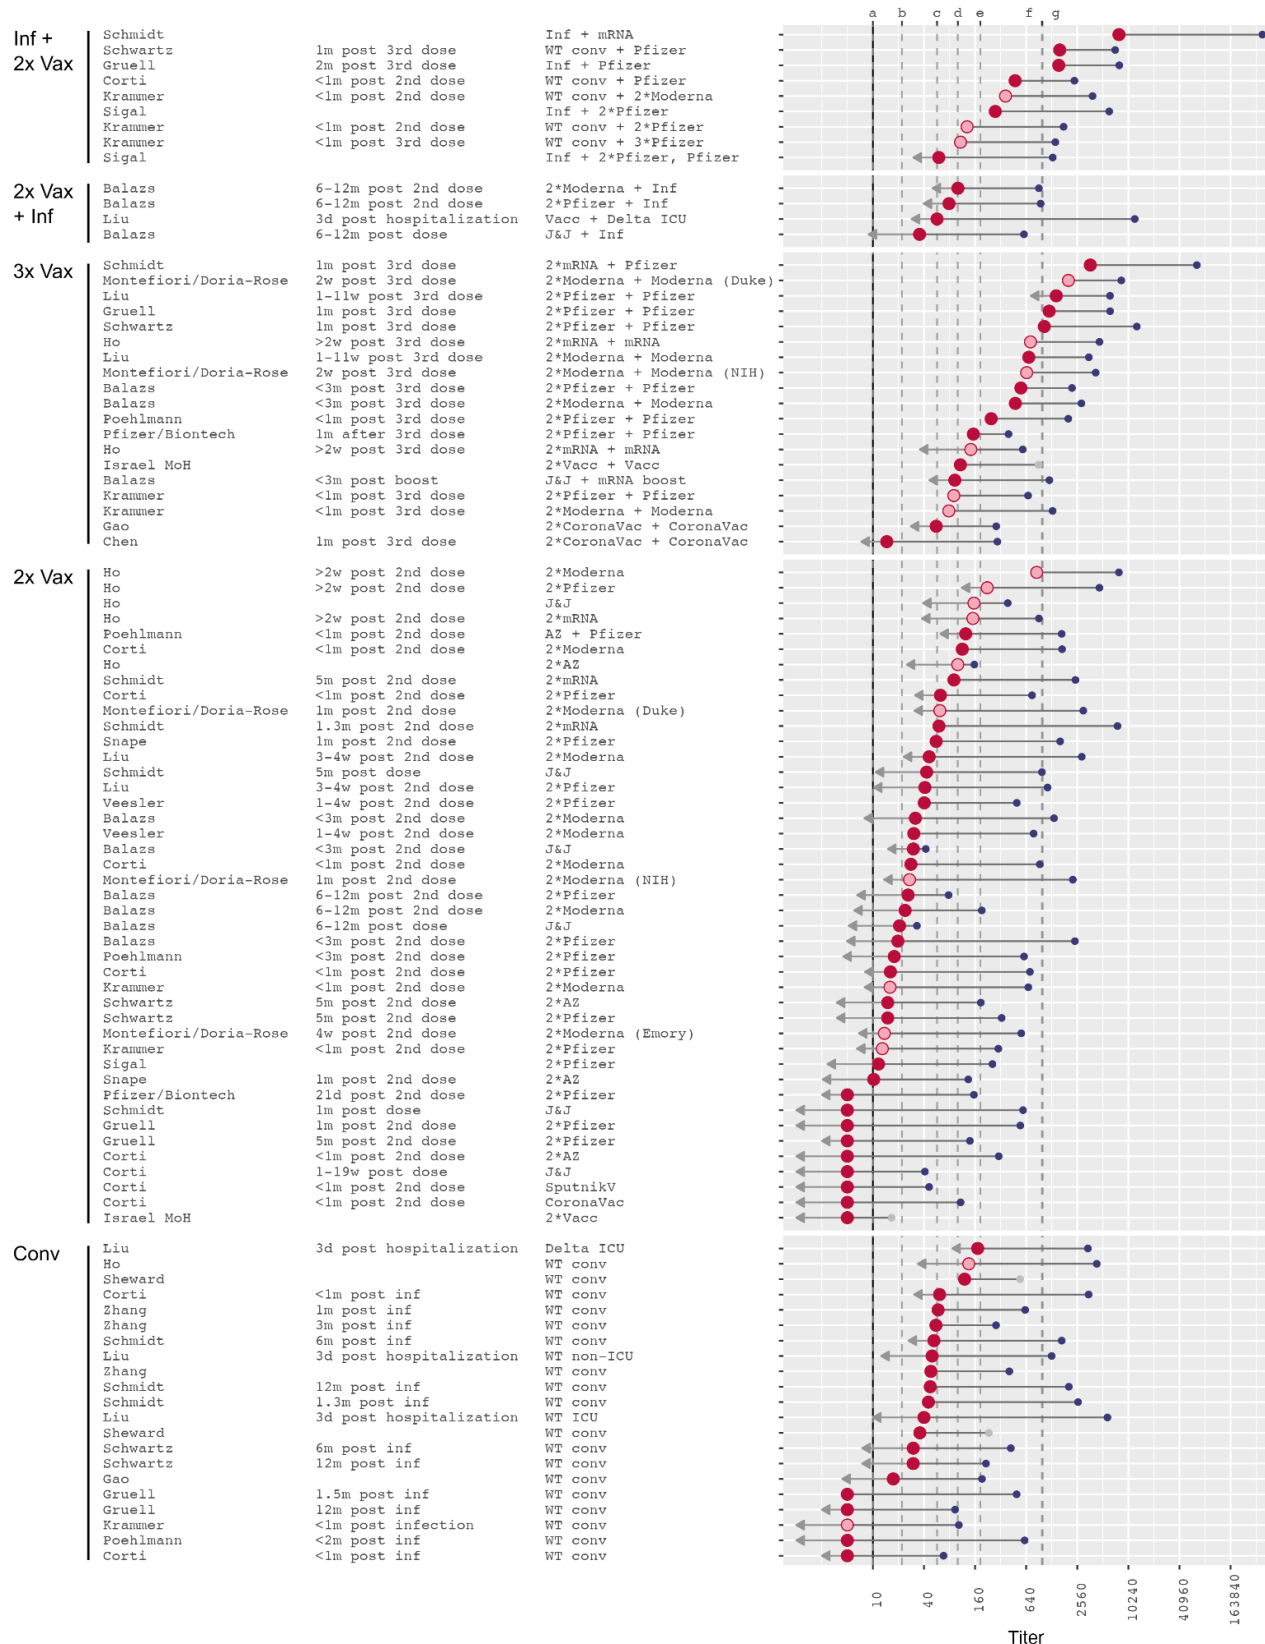

**Figure 3: Omicron titers relative to wild type ordered by decreasing Omicron titers.** Same as Figure 2, but datasets within each group are sorted by Omicron titer instead of wild type titer.

## 184 Discussion

185 Two definitive statements can be made from the aggregation of the early data on Omicron  
186 virus neutralization data. Sera from individuals who have been vaccinated twice or infected  
187 once show generally more than a 19x fold drop of titers, whereas people who have been  
188 vaccinated three times or have been vaccinated + infected show an average of approximately  
189 7x fold drop of titers. This reduced titer drop in three times vaccinated individuals appears to  
190 be real and not an artifact of an upper limit of detection of the assay. Almost all of the data in  
191 the three times vaccinated group are, however, from sera taken within 1 month of the last  
192 vaccination, whether this reduced titer drop will persist over time is yet to be determined.  
193 Nevertheless, the substantially lower fold drop and somewhat higher titers after a third  
194 vaccination are strong early evidence for the utility of booster vaccination at increasing virus  
195 neutralization titers against Omicron, and thus potentially at increasing vaccine efficacy.

196  
197 Some of the data we use are estimates as numerical data or individual repeat data is not  
198 available at this early stage. In such cases we extracted individual data points from figures  
199 using Webplotgitizer<sup>3</sup> and this will lead to some inaccuracies. Censored titers below an assay's  
200 detection threshold further increase these uncertainties. The fold drops for the twice  
201 vaccinated group, for example, is likely substantially greater than the 19x numeric estimate.  
202 However, a deflation of fold drops due to wild type titers at or above an assay's limit of  
203 detection is unlikely, as visible in Figure 2. The differences between Omicron and WT titers are  
204 roughly consistent across studies in the triple vaccinated and infected + vaccinated cohort and  
205 are not influenced by the absolute magnitude of WT titers.

206  
207 In terms of titer and fold drop estimates, the triple vaccinated group is more similar to the  
208 infected + vaccinated than to the double vaccinated group. It needs to be noted that in these

studies the time point of most recent vaccination was less than 3 months prior to serum collection, in the majority of cases 1 month prior to collection. How titers against Omicron develop over time is yet to be seen..

While we did not see a difference in fold drops from WT to Omicron neutralization depending on assay type, the titers reported in studies that used pseudovirus neutralization assays exceeded titers measured by live-virus neutralization. Omicron titers in double vaccinees were on average 2 times higher in pseudovirus than in live-virus assays, and almost 3-fold higher in triple vaccinees. This could, however, be a consequence of the sera types investigated using the different assays. The majority of PV sera came from mRNA vaccinated individuals, whereas live-virus assay tested sera contained sera from J&J, SputnikV and CoronaVac vaccinated individuals which tend to induce lower titers than mRNA vaccines (Extended Data Figure 9). Nevertheless, in Feng et al.'s<sup>27</sup> study of vaccine efficacy (VE) against symptomatic disease after two doses of AstraZeneca, they reported lower VE at higher titers in live-virus neutralization vs. pseudovirus neutralization assays.

## 225 References

- 226 1. Aggregated Omicron neutralization data.  
227 <https://docs.google.com/spreadsheets/d/1K4qzjtMk0pGLWOrLe8HZlqVPN67GkNCK/edit>.
- 228 2. Rohatgi, A. WebPlotDigitizer - Extract data from plots, images, and maps.  
229 <https://automeris.io/WebPlotDigitizer/>.
- 230 3. Wilks, S. meantiter. <https://github.com/shwilks/meantiter>.
- 231 4. Cele, S. *et al.* SARS-CoV-2 Omicron has extensive but incomplete escape of Pfizer  
232 BNT162b2 elicited neutralization and requires ACE2 for infection. *medRxiv* (2021)  
233 doi:10.1101/2021.12.08.21267417.
- 234 5. Sheward, D. J., *et al.* Preliminary Report - Early release, subject to modification:  
235 Quantification of the neutralization resistance of the Omicron Variant of Concern. (2021).
- 236 6. Wilhelm, A., Widera, M., Grikscheit, K., Toptan, T. & Schenk, B. Reduced neutralization of  
237 SARS-CoV-2 Omicron variant by vaccine sera and monoclonal antibodies. *MedRxiv*  
238 (2021).
- 239 7. Wang, Y. *et al.* The significant immune escape of pseudotyped SARS-CoV-2 variant  
240 Omicron. *Emerg. Microbes Infect.* **11**, 1–5 (2022).
- 241 8. Uriu, K. *et al.* Neutralization of the SARS-CoV-2 Mu Variant by Convalescent and Vaccine  
242 Serum. *New England Journal of Medicine* vol. 385 2397–2399 (2021).
- 243 9. Yu, X. *et al.* Enhanced neutralization against SARS-CoV-2 by vaccine booster exhibits  
244 reduction of Omicron variant. *bioRxiv* (2021) doi:10.1101/2021.12.17.21267961.
- 245 10. Bowen, J. E. *et al.* SARS-CoV-2 spike conformation determines plasma neutralizing  
246 activity. *bioRxiv* 2021.12.19.473391 (2021) doi:10.1101/2021.12.19.473391.
- 247 11. Rössler, A., Riepler, L., Bante, D., von Laer, D. & Kimpel, J. SARS-CoV-2 B.1.1.529  
248 variant (Omicron) evades neutralization by sera from vaccinated and convalescent  
249 individuals. doi:10.1101/2021.12.08.21267491.

- 250 12. Cameroni, E. *et al.* Broadly neutralizing antibodies overcome SARS-CoV-2 Omicron  
251 antigenic shift. *bioRxiv* (2021) doi:10.1101/2021.12.12.472269.
- 252 13. Meng, B. *et al.* SARS-CoV-2 Omicron spike mediated immune escape, infectivity and cell-  
253 cell fusion. (2021).
- 254 14. Cong, Z. *et al.* Neutralization and Stability of SARS-CoV-2 Omicron Variant.  
255 doi:10.1101/2021.12.16.472934.
- 256 15. Pfizer and BioNTech Provide Update on Omicron Variant.  
257 [https://www.pfizer.com/news/press-release/press-release-detail/pfizer-and-biontech-](https://www.pfizer.com/news/press-release/press-release-detail/pfizer-and-biontech-provide-update-omicron-variant)  
258 [provide-update-omicron-variant.](https://www.pfizer.com/news/press-release/press-release-detail/pfizer-and-biontech-provide-update-omicron-variant)
- 259 16. Schmidt, F. *et al.* Plasma neutralization properties of the SARS-CoV-2 Omicron variant.  
260 *Google Docs* <https://drive.google.com/file/d/1zjJWsybGaa3egiyn5nQqTzBtl0kmvMUu/view>  
261 (2021).
- 262 17. Neutralization Data Posted on Twitter by Joe Scholar. *Twitter*  
263 <https://twitter.com/JScholar/status/1470110894856286216> (2021).
- 264 18. HKUMed-CU Medicine joint study finds COVID-19 variant Omicron significantly reduces  
265 virus neutralisation ability of BioNTech vaccine.  
266 [http://www.med.hku.hk/en/news/press/20211212-omicron-avoids-killing-by-blood-serum.](http://www.med.hku.hk/en/news/press/20211212-omicron-avoids-killing-by-blood-serum)
- 267 19. Garcia-Beltran, W. F. *et al.* mRNA-based COVID-19 vaccine boosters induce neutralizing  
268 immunity against SARS-CoV-2 Omicron variant. *medRxiv* (2021)  
269 doi:10.1101/2021.12.14.21267755.
- 270 20. Gruell, H., Vanshylla, K., Tober-Lau, P. & Hillus, D. mRNA booster immunization elicits  
271 potent neutralizing serum activity against the SARS-CoV-2 Omicron variant. *medRxiv*  
272 (2021).
- 273 21. Hoffmann, M., Krüger, N., Schulz, S. & Cossmann, A. The Omicron variant is highly  
274 resistant against antibody-mediated neutralization-implications for control of the COVID-19

pandemic. *bioRxiv* (2021).

22. Doria-Rose, N. A. *et al.* Booster of mRNA-1273 Vaccine Reduces SARS-CoV-2 Omicron Escape from Neutralizing Antibodies. *medRxiv* (2021) doi:10.1101/2021.12.15.21267805.

23. Liu, L. *et al.* Striking Antibody Evasion Manifested by the Omicron Variant of SARS-CoV-2. *bioRxiv* (2021).

24. Planas, D., Saunders, N., Maes, P. & Benhassine, F. G. Considerable escape of SARS-CoV-2 variant Omicron to antibody neutralization. *bioRxiv* (2021).

25. Dejnirattisai, W., Shaw, R. H., Supasa, P., Liu, C. & Stuart, A. S. V. Reduced neutralisation of SARS-COV-2 Omicron-B. 1.1. 529 variant by post-immunisation serum. *medRxiv* (2021).

26. Zhao, X. *et al.* Reduced sera neutralization to Omicron SARS-CoV-2 by both inactivated and protein subunit vaccines and the convalescents. *bioRxiv* 2021.12.16.472391 (2021) doi:10.1101/2021.12.16.472391.

27. Feng, S. *et al.* Correlates of protection against symptomatic and asymptomatic SARS-CoV-2 infection. *Nat. Med.* **27**, 2032–2040 (2021).

28. Gilbert, P. B. *et al.* Immune Correlates Analysis of the mRNA-1273 COVID-19 Vaccine Efficacy Trial. *medRxiv* (2021) doi:10.1101/2021.08.09.21261290.

294 **Table 1: List of considered studies.**

| Study                                      | Date of appearance | Assay Type            | Cell Type      | R346K |
|--------------------------------------------|--------------------|-----------------------|----------------|-------|
| <b>Sigal</b> <sup>4</sup>                  | 2021.12.6 & 15     | Live-virus            | H1299 ACE2     | Yes   |
| <b>Sheward</b> <sup>5</sup>                | 2021.12.7          | Lentiviral Pseudotype | HEK293T ACE2   | No    |
| <b>Pfizer/BioNTech</b> <sup>15</sup>       | 2021.12.8          | Pseudotype            | Unknown        | NA    |
| <b>Ciesek</b> <sup>6</sup>                 | 2021.12.8          | Live-virus            | Caco-2         | No    |
| <b>Kimpel</b> <sup>11</sup>                | 2021.12.8          | Live-virus            | Unknown        | No    |
| <b>Schmidt</b> <sup>16</sup>               | 2021.12.12         | HIV-1 Pseudotype      | HT1080 ACE2    | No    |
| <b>Israel MoH</b> <sup>17</sup>            | 2021.12.12         | Live-virus            | Unknown        | NA    |
| <b>Zhang</b> <sup>7</sup>                  | 2021.12.10         | Pseudotype            | Huh 7          | No    |
| <b>HKU</b> <sup>18</sup>                   | 2021.12.12         | Live-virus            | Unknown        | NA    |
| <b>Balazs</b> <sup>19</sup>                | 2021.12.14         | Lentiviral Pseudotype | HEK293T ACE2   | No    |
| <b>Gruell</b> <sup>20</sup>                | 2021.12.14         | Lentiviral Pseudotype | HEK293T ACE2   | No    |
| <b>Corti</b> <sup>12</sup>                 | 2021.12.14         | VSV Pseudotype        | VeroE6         | No    |
| <b>Poehlmann</b> <sup>21</sup>             | 2021.12.13         | VSV Pseudotype        | Vero Cells     | No    |
| <b>Montefiori/Doria-Rose</b> <sup>22</sup> | 2021.12.15         | Lentiviral Pseudotype | Unknown        | No    |
| <b>Ho</b> <sup>23</sup>                    | 2021.12.15         | Pseudovirus           | VeroE6         | Yes   |
| <b>Schwartz</b> <sup>24</sup>              | 2021.12.14         | Live-virus            | S-Fuse cells   | NA    |
| <b>Gupta</b> <sup>13</sup>                 | 2021.12.20         | Pseudovirus           | 293T TMPRSS2*  | NA    |
| <b>Snape</b> <sup>25</sup>                 | 2021.12.11         | Live-virus            | Vero Cells     | NA    |
| <b>Liu</b> <sup>14</sup>                   | 2021.12.20         | Lentiviral Pseudotype | HEK293T ACE2   | NA    |
| <b>Krammer</b> <sup>8</sup>                | 2021.12.20         | Live-virus            | VeroE6 TMPRSS2 | NA    |
| <b>Chen</b> <sup>9</sup>                   | 2021-12-22         | Pseudovirus           | Unknown        | NA    |
| <b>Gao</b> <sup>26</sup>                   | 2021-12-22         | Pseudovirus           | Unknown        | NA    |
| <b>Veesler</b> <sup>10</sup>               | 2021-12-22         | VSV Pseudotype        | VeroE6 TMPRSS2 | NA    |

\*293T TMPRSS2 ACE2 transfected. NA in Column R346K was used when no information on this substitution was available. Supplementary Tables 1-4 have further details on these studies.

## 299 **Methods**

### 300 **Data collection**

301 Omicron neutralization data from publicly available preprints, reports or tweets were collected  
302 and categorized according to assay type, vaccine and convalescent sera tested, and the  
303 presence of the R346K substitution in the spike in addition to the common set of Omicron  
304 spike substitutions. In most cases, datasets are named after the corresponding author. A full

list of all studies considered is shown in Table 1, detailed metadata in Supplementary Tables 1-4.

### **Geometric Mean Titer and fold drop calculation**

We used numerical data on geometric mean titers (GMT) and Omicron titer fold drops to a reference antigen as stated in each preprint. In case of missing GMT data, GMTs were either directly extracted from the manuscripts' figures using Webplotdigitizer<sup>2</sup> or individual data points were extracted by the same method and GMTs subsequently calculated with the meantiter R package<sup>3</sup> (method = "truncated\_normal", dilution\_stepsize = 0), which performs a Bayesian statistics analysis to correctly handle thresholded values. Thresholded titers for individual data were set to "<Limit of Detection (LOD)" prior to GMT calculation via the meantiters package. In case of thresholded GMTs directly available or extracted from the manuscript, we set the GMT estimates to LOD/2. When data points needed to be extracted from figures, individual measurements were often overlapping and difficult to distinguish. Hence, in some cases the sample number given in the manuscript differs from the number of data points used to calculate the GMT in this analysis. If numerical data on fold drops but not GMTs were available, we used the fold drops as given in the manuscript and determined GMTs as described above. Otherwise fold drops were calculated by dividing the reference antigen GMT by the Omicron GMT. Omicron GMTs were obtained by applying the fold drop from to the reference antigen GMT. GMTs per serum group were calculated using the meantiter R package<sup>3</sup> with the same parameters as before.

Webplotdigitizer<sup>2</sup> was used for the following studies: GMTs for Sigal<sup>4</sup> 2\*Pfizer and Infection(Inf)+Pfizer sera, Sheward<sup>5</sup>, Ciesek<sup>6</sup>, Zhang<sup>7</sup> (subset), Krammer<sup>8</sup>, Chen<sup>9</sup> and Veessler<sup>10</sup> were obtained by Webplotdigitizer. GMTs and fold changes were obtained by Webplotdigitizer for Kimpel<sup>11</sup>, Corti<sup>12</sup> (subset), Gupta<sup>13</sup> and Liu<sup>14</sup>. The data for

Pfizer/BioNTech<sup>15</sup>, Schmidt<sup>16</sup>, Israel MoH<sup>17</sup>, HKU<sup>18</sup>, Balazs<sup>19</sup>, Gruell<sup>20</sup>, Poehlmann<sup>21</sup>,  
Montefiori/Doria-Rose<sup>22</sup>, Ho<sup>23</sup>, Schwartz<sup>24</sup>, Snape<sup>25</sup>, Gao<sup>26</sup> were directly obtained from the  
respective manuscripts or reports.

### **Dataset availability**

The aggregate dataset is available as a publicly accessible google sheets document<sup>1</sup>.

**Acknowledgements:** Thanks and kudos, to the laboratories listed above that have rapidly  
generated data and put it into the public domain. We thank Poppy Roth for technical  
assistance.

**Funding:** This work was funded by the NIH Centers of Excellence for Influenza Research and  
Surveillance (CEIRS, contract # HHSN272201400008C) and Centers of Excellence for  
Influenza Research and Response (CEIRR, contract #75N93021C00014).

**Author contributions:** B. Mühlemann contributed information on recently published datasets  
and reviewing the manuscript. S.H. Wilks contributed the initial fold drop forest plot.

The authors declare no competing interests.

**Supplementary Information** is available for this paper.

Correspondence and requests for materials should be addressed to Derek J. Smith  
([djs200@cam.ac.uk](mailto:djs200@cam.ac.uk))

## Extended Data

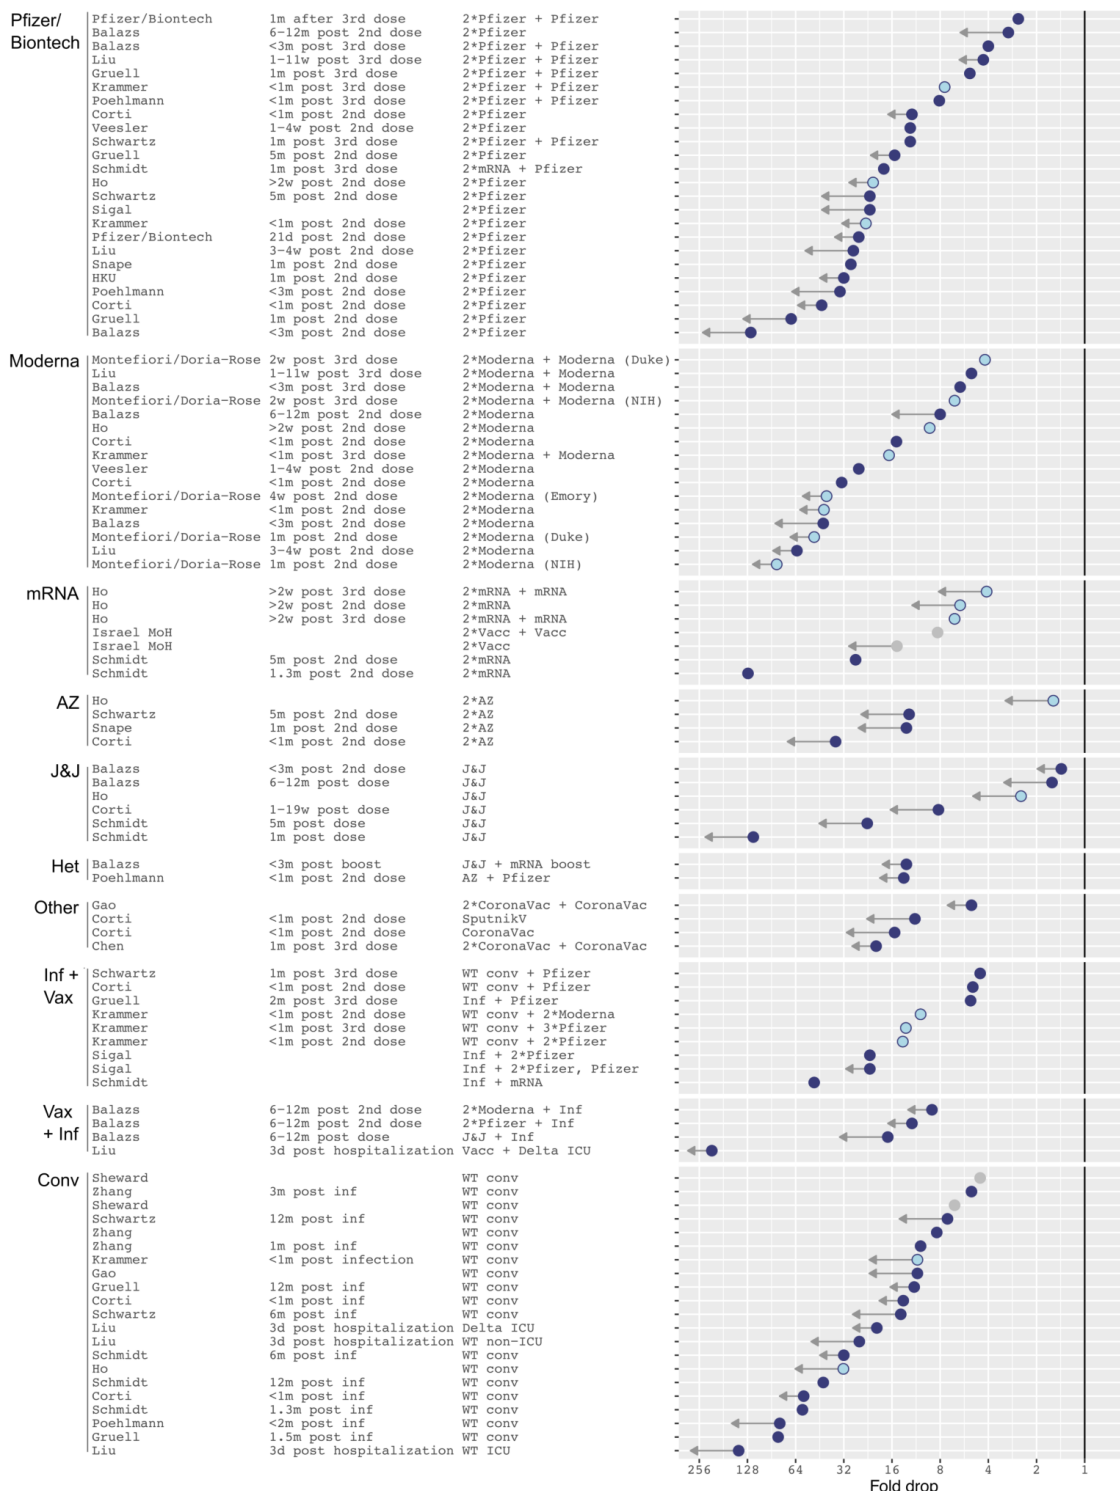

**Extended Data Figure 1: Omicron fold drops grouped by vaccine type relative to wild type.** Data was grouped by vaccine type and infection history (mRNA: unspecified mRNA vaccine, AZ: AstraZeneca, J&J: Johnson & Johnson, Het: Heterologous vaccination, Inf + Vax: infection then vaccinations, Vax + Inf: vaccination then infection, Conv: convalescent). The solid line marks no fold change. Arrows indicate uncertainties in the point estimate. A short arrow marks measurements with less than half of Omicron titers below the assay's limit of detection (LOD), or conversely reference antigen titers at or higher than the LOD. Long arrows mark measurements with more than approximately 80% of Omicron titers below the LOD. Light blue dots show NIH SAVE laboratories, gray dots mark data points for which the reference antigen was not stated in the manuscript and is here assumed to be Wu-1.

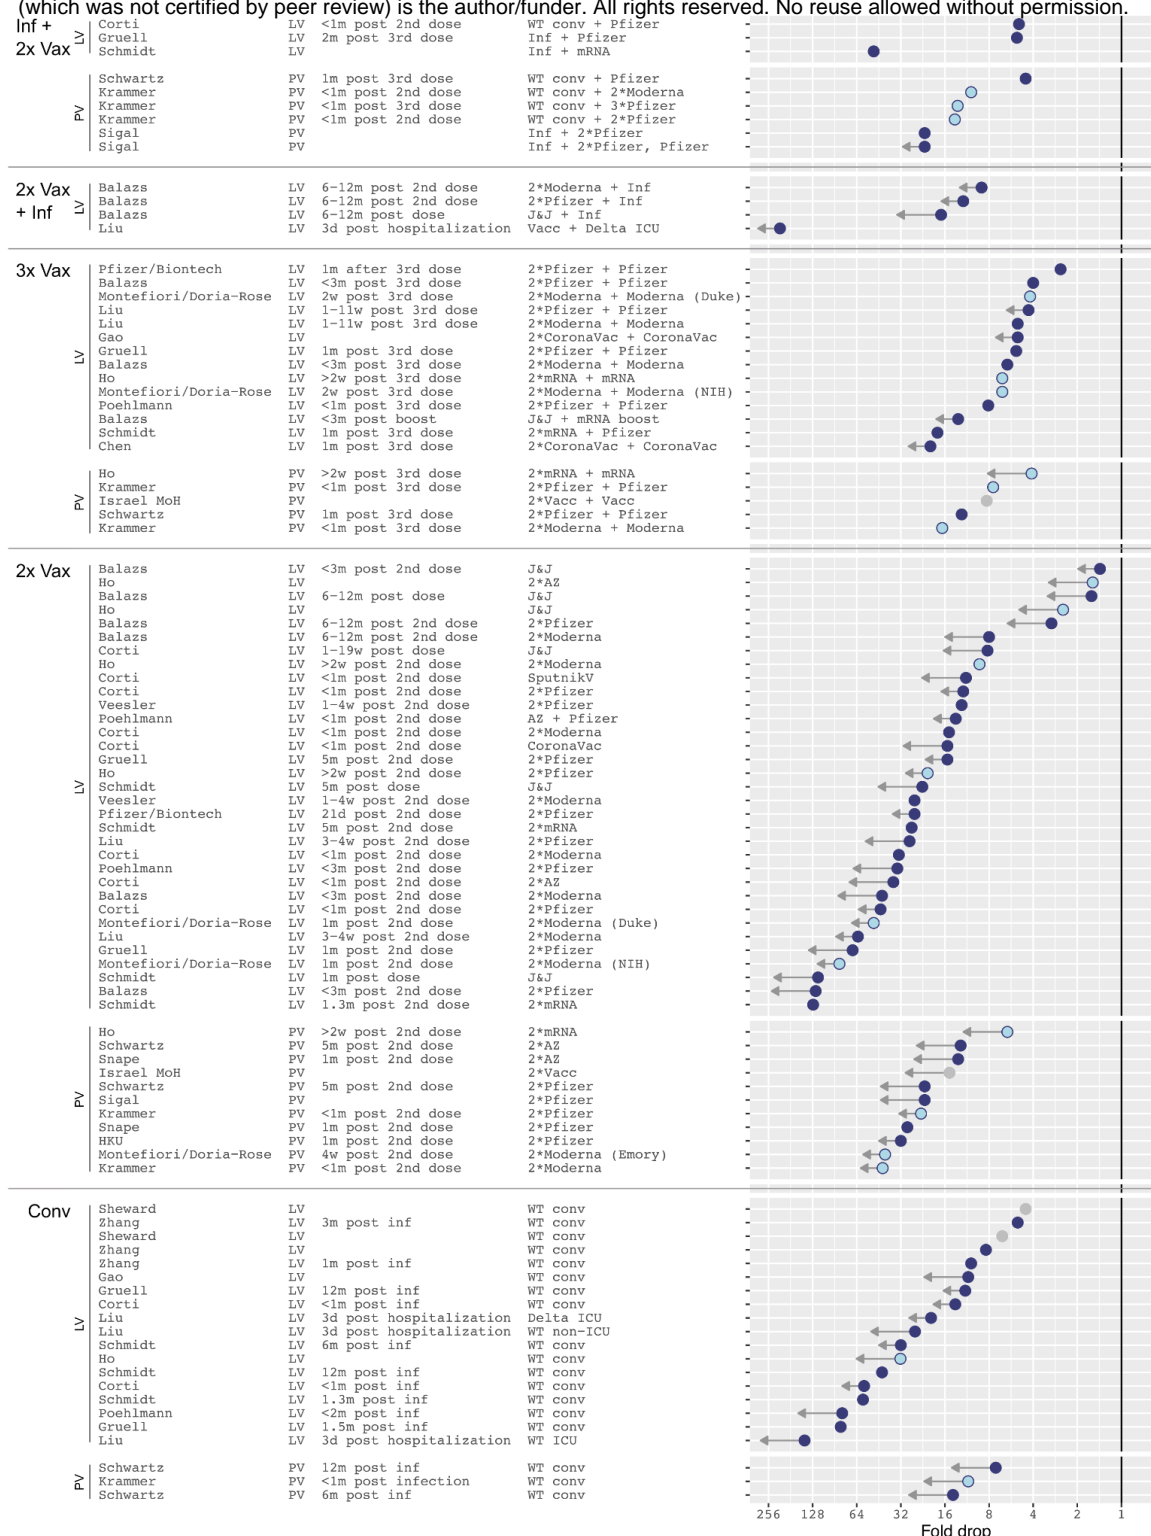

**Extended Data Figure 2: Omicron fold drops grouped by serum group and assay relative to wild type.** Same as Extended Data Figure 1, but datasets are grouped by serum group and within the serum groups subgrouped by assay type (LV: Live-virus, PV: Pseudovirus).

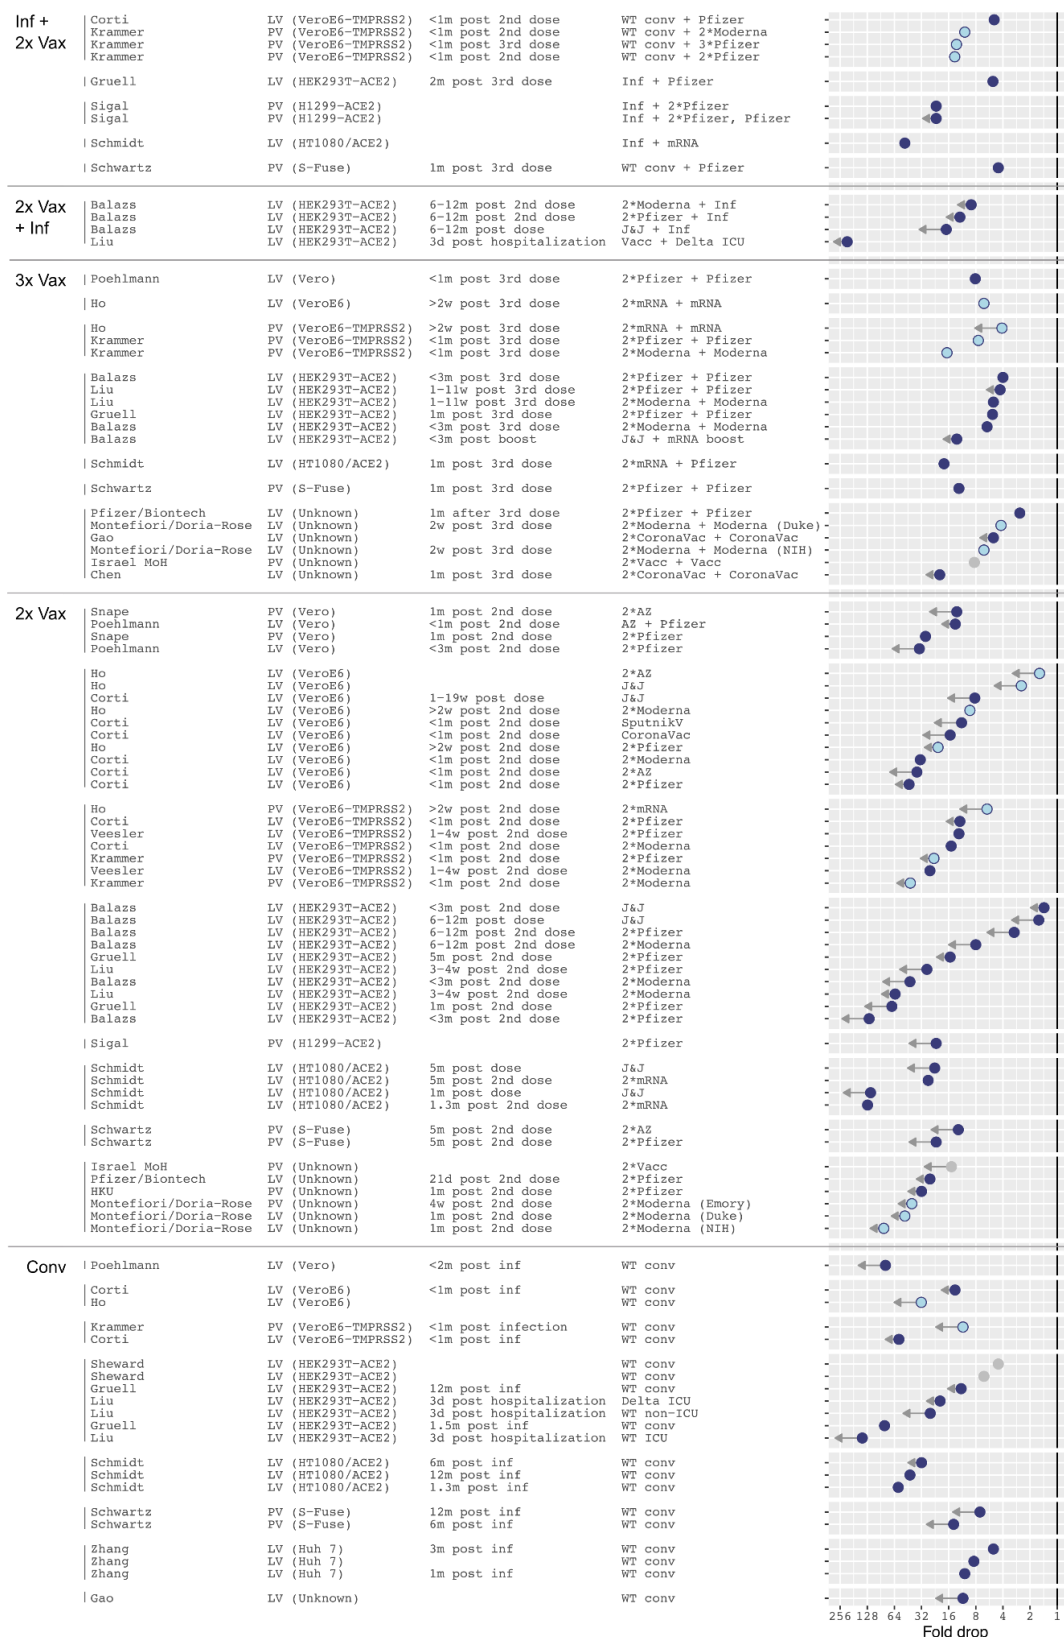

**Extended Data Figure 3: Omicron fold drops grouped by serum group and cell type relative to wild type.** Same as Extended Data Figure 1, but datasets are grouped by serum group and within the serum groups subgrouped by cell type (LV: Live-virus, PV: Pseudovirus).

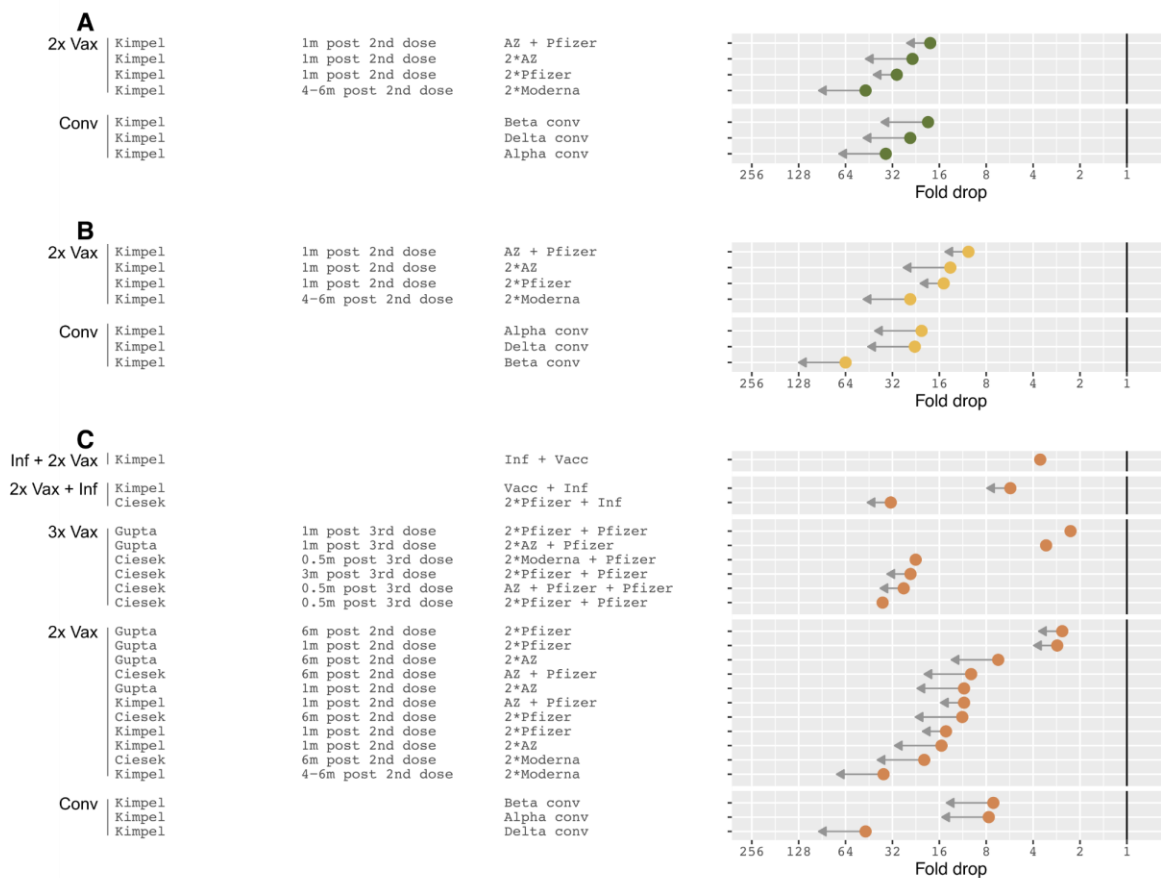

**Extended Data Figure 4: Omicron fold drops grouped by serum group relative to variants. A) Alpha (B.1.1.7; green), B) Beta (B.1.351; yellow) and C) Delta (B.1.617.2; orange).** Same as Extended Data Figure 1, but datasets are grouped by serum group and fold drops calculated relative to variant titers.

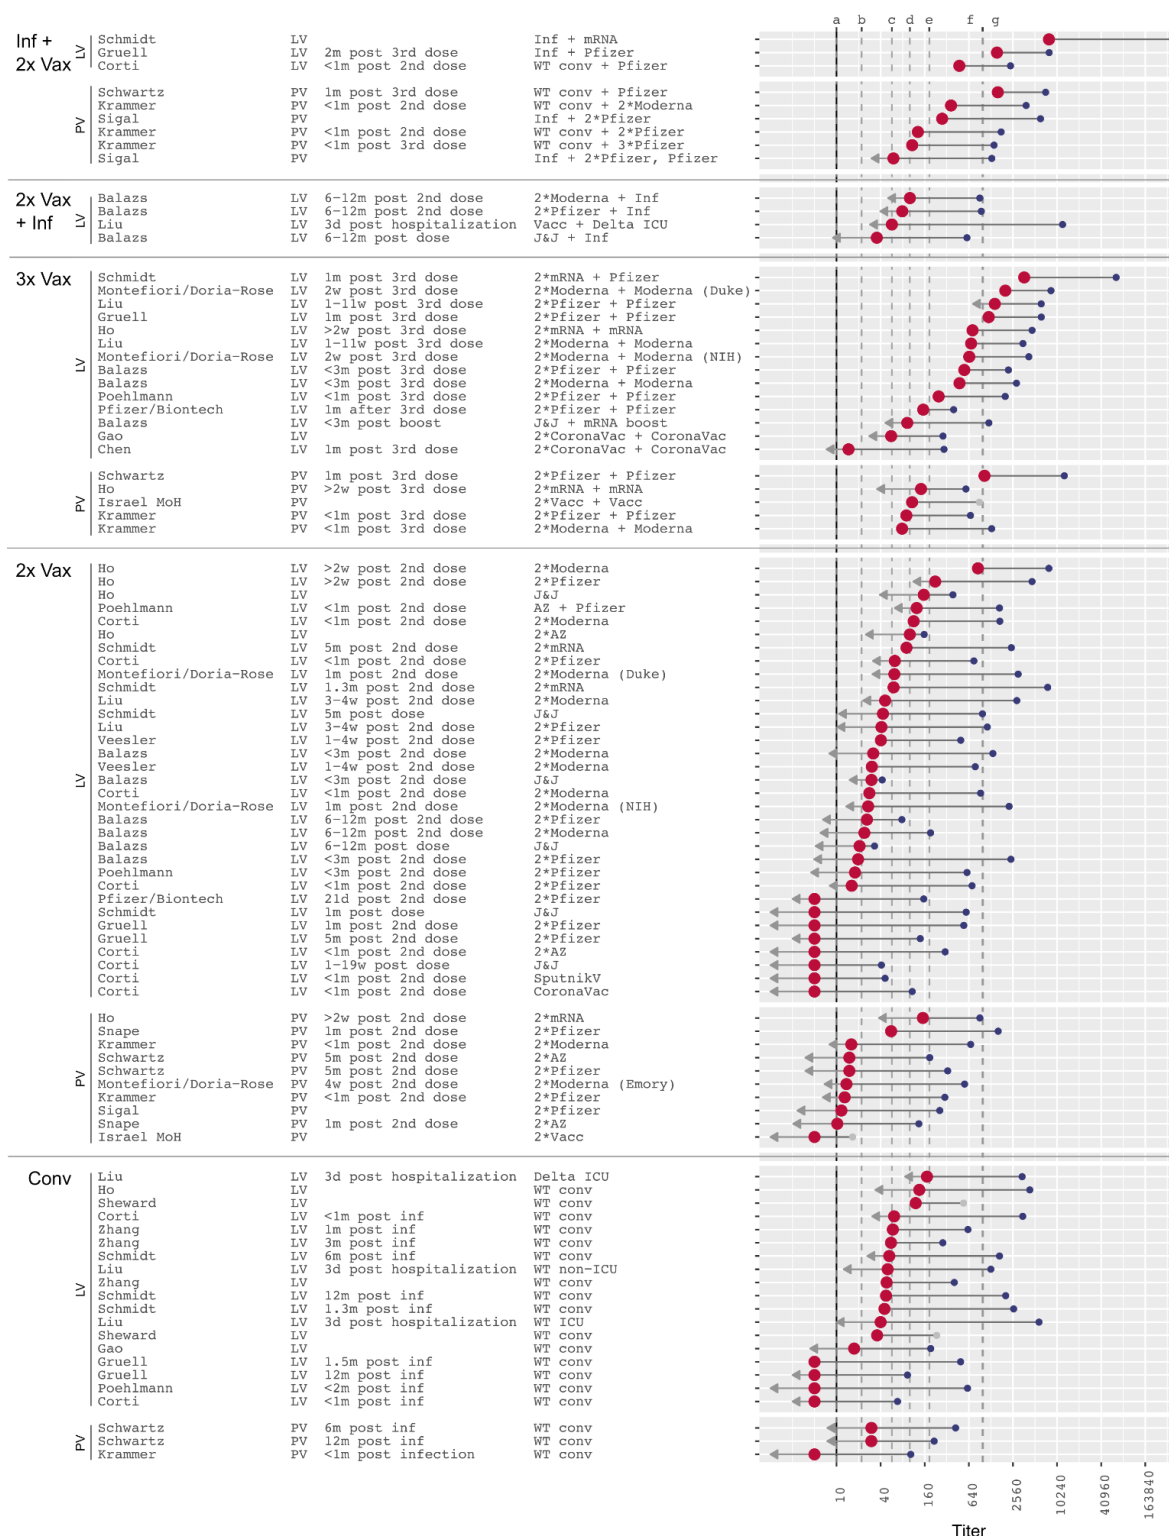

**Extended Data Figure 5: Omicron titers grouped by serum type and assay relative to wild type and ordered by decreasing Omicron titers.** Within each serum group, the datasets are subgrouped by assay type (LV: Live-virus, PV: Pseudovirus). Large red dots indicate Omicron titers and small colored dots indicate variant titers. Omicron titers were obtained by applying the fold drop given in Extended Data Figure 2 to variant titers, corresponding to the horizontal bar connecting point estimates. Variant titer data was either obtained from the manuscript or through Weplotdigitizer<sup>3</sup> where not available. Arrows indicate uncertainties in the point estimate. A short arrow marks measurements with less than half of Omicron titers below the assay's limit of detection (LOD), or conversely reference antigen titers at or higher than the LOD. Long arrows mark measurements with more than approximately 80% of Omicron titers below the LOD. Dashed lines mark thresholds of protection against symptomatic disease after vaccination with two doses of Moderna (a,d,f,g)<sup>28</sup> or AstraZeneca (b,c,e,f)<sup>27</sup> assessed by pseudovirus neutralization assay (a 78% VE, b 60% VE, c 70% VE, d 91% VE, e 80% VE, f 90% VE, g 96% VE). Pink dots show NIH SAVE laboratories.

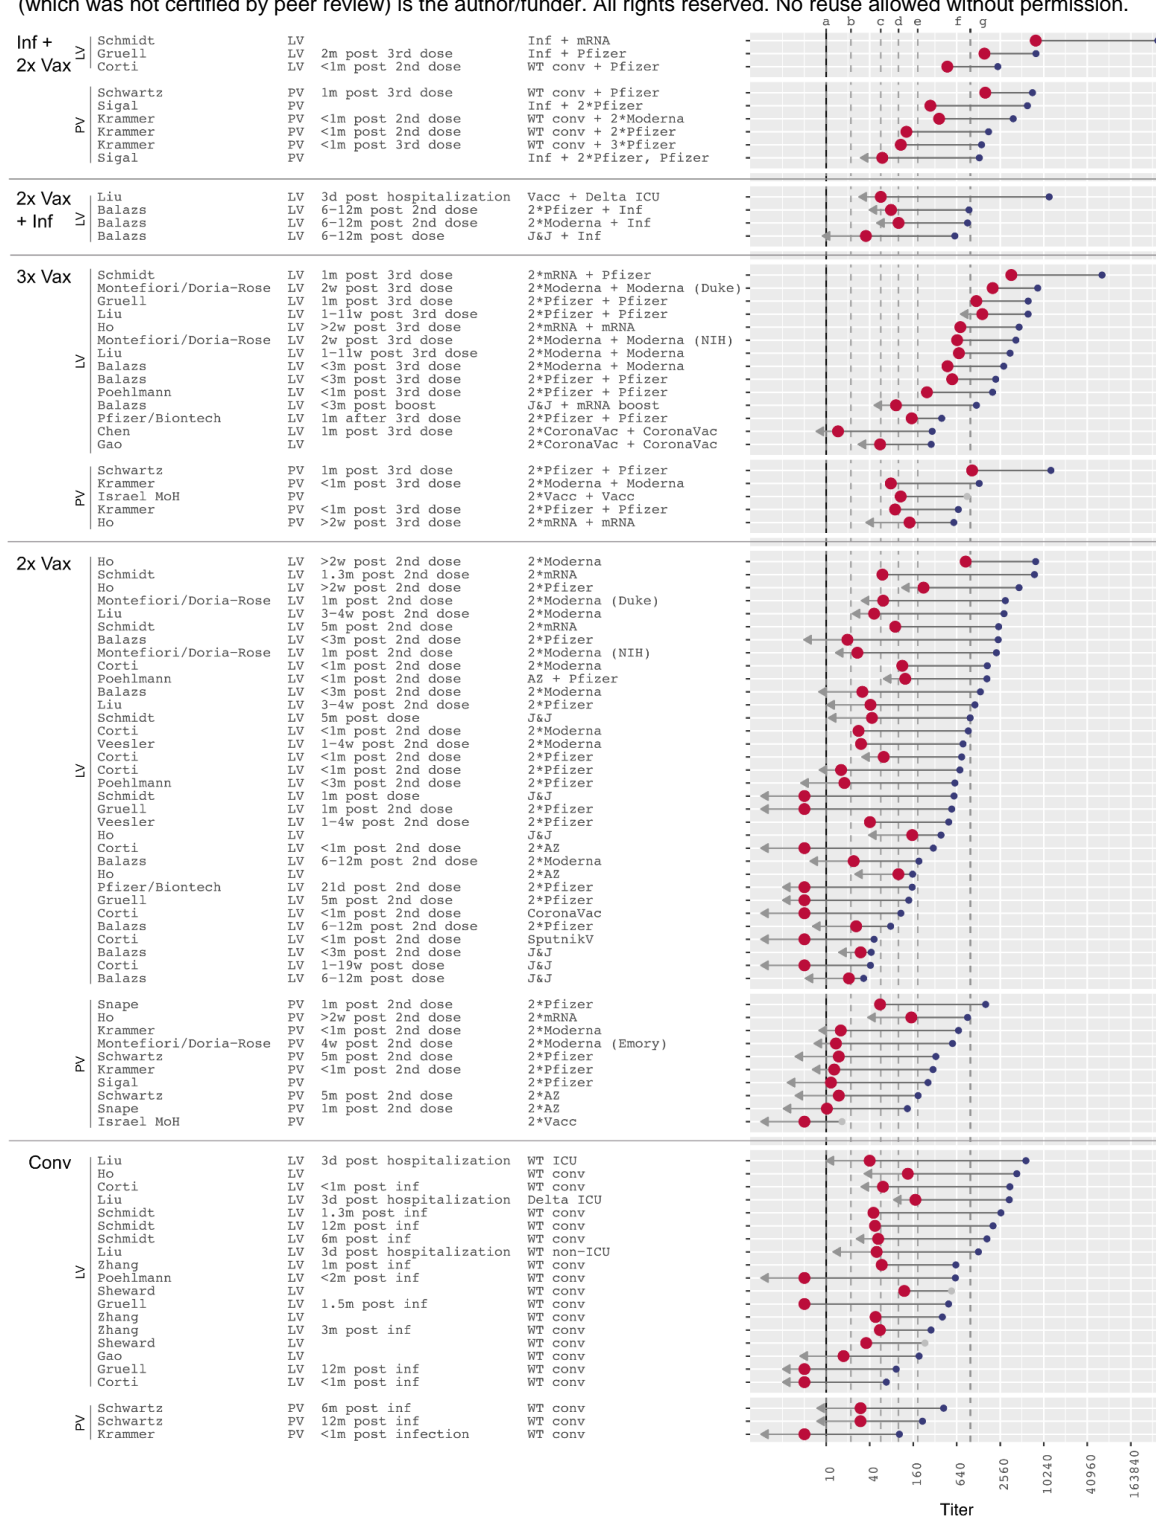

**Extended Data Figure 6: Omicron titers grouped by serum type and assay relative to wild type and ordered by decreasing wild type titers. Same as Extended Data Figure 5, but titers are ordered by decreasing wild type titers.**

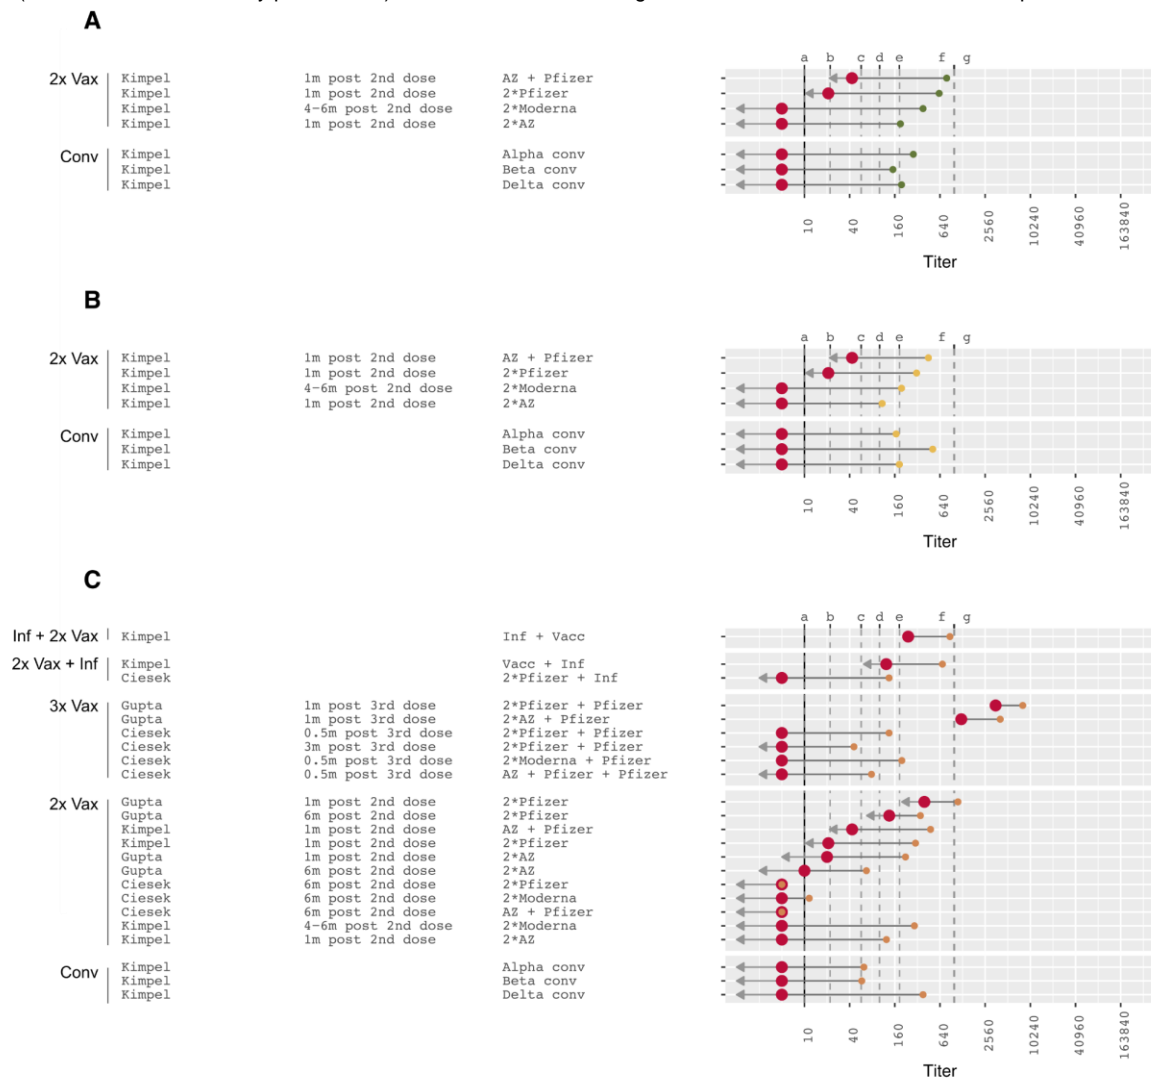

**Extended Data Figure 7: Omicron titers grouped by serum group relative to variants and ordered by decreasing Omicron titers. A) Alpha (B.1.1.7; small green), B) Beta (B.1.351; small yellow) and C) Delta (B.1.617.2; small orange).** Same as Extended Data Figure 5, but titers are grouped by serum grouped and calculated relative to SARS-CoV-2 variants.

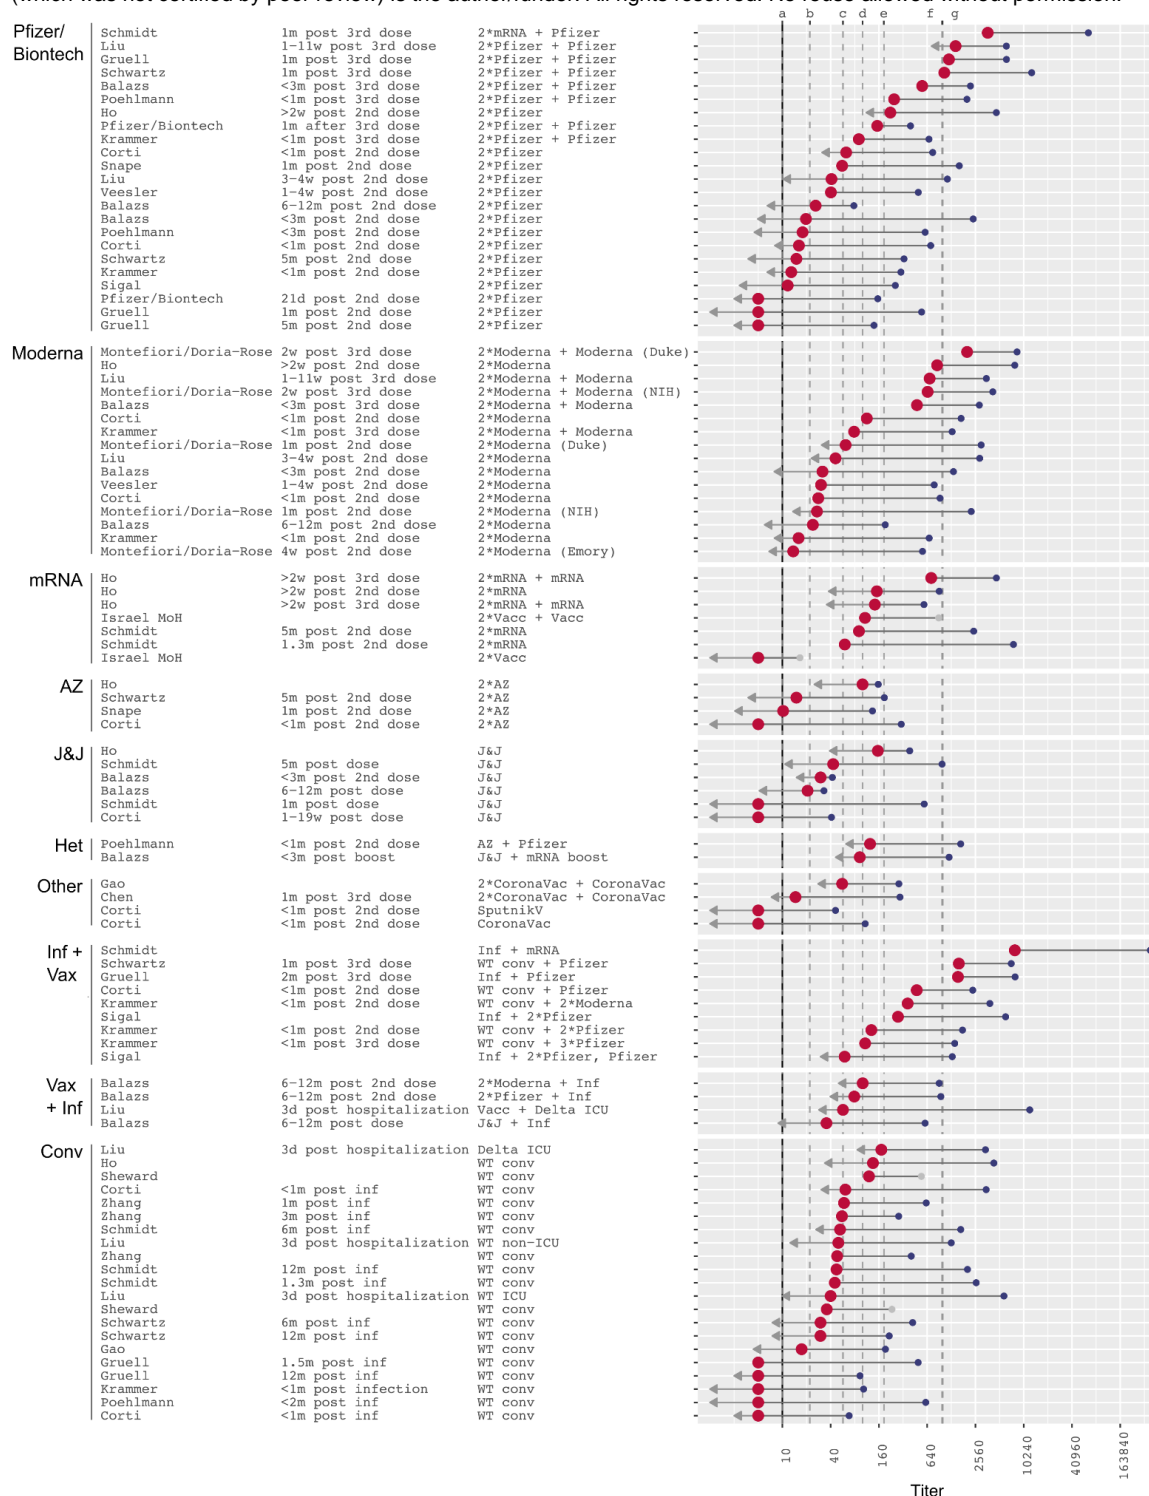

**Extended Data Figure 8: Omicron titers grouped by vaccine type relative to wild type and ordered by decreasing Omicron titers.** Same as Extended Data Figure 5, but titers are grouped by vaccine type.

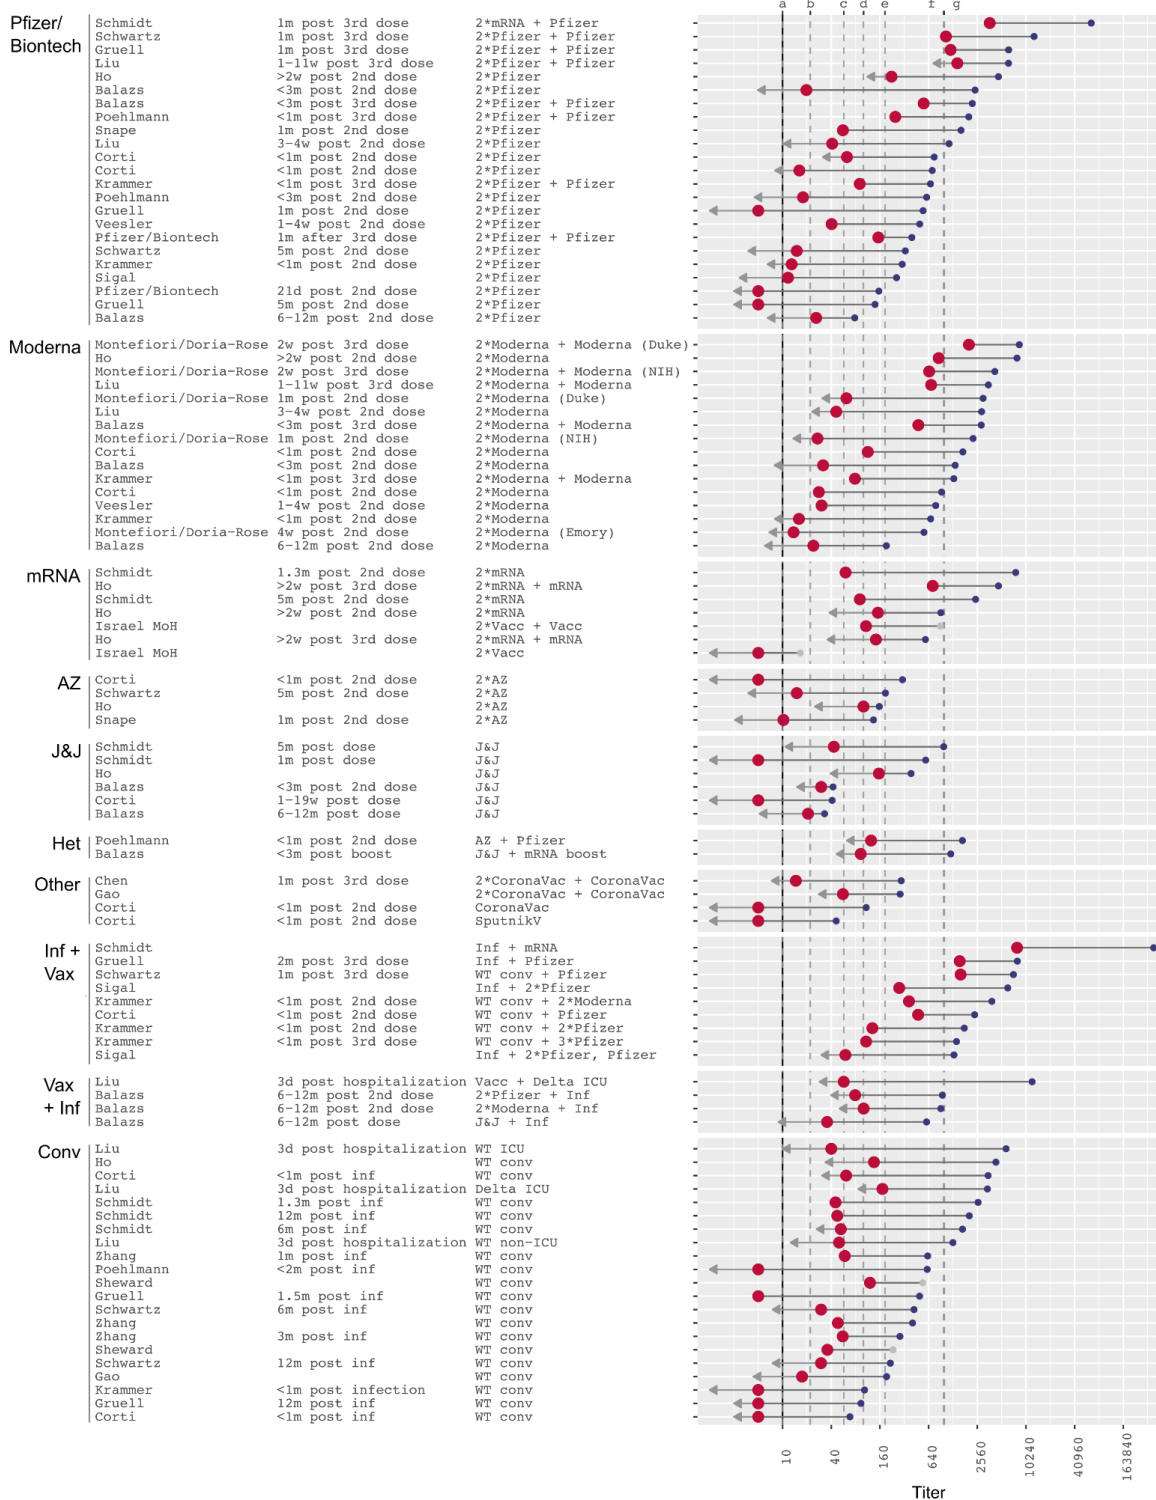

**Extended Data Figure 9: Omicron titers grouped by vaccine type relative to wild type and ordered by decreasing wild type titers.** Same as Extended Data Figure 5, but titers are grouped by vaccine type and ordered by decreasing wild type titers.
